# Supplementary material for: Lack of detection of a human placenta microbiome in samples from preterm and term deliveries
Source: PubMed Central journal article supplement (PMC6208038; doi:10.1186/s40168-018-0575-4), 2018-10-30

# Figure S1

16s rRNA Gene Sequence Reads

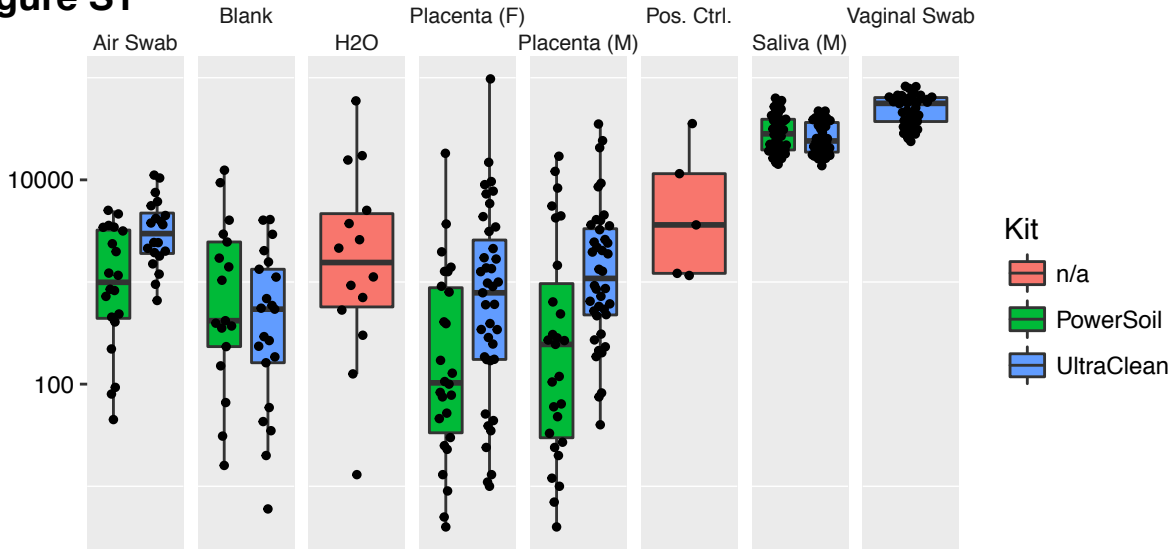

# Figure S2

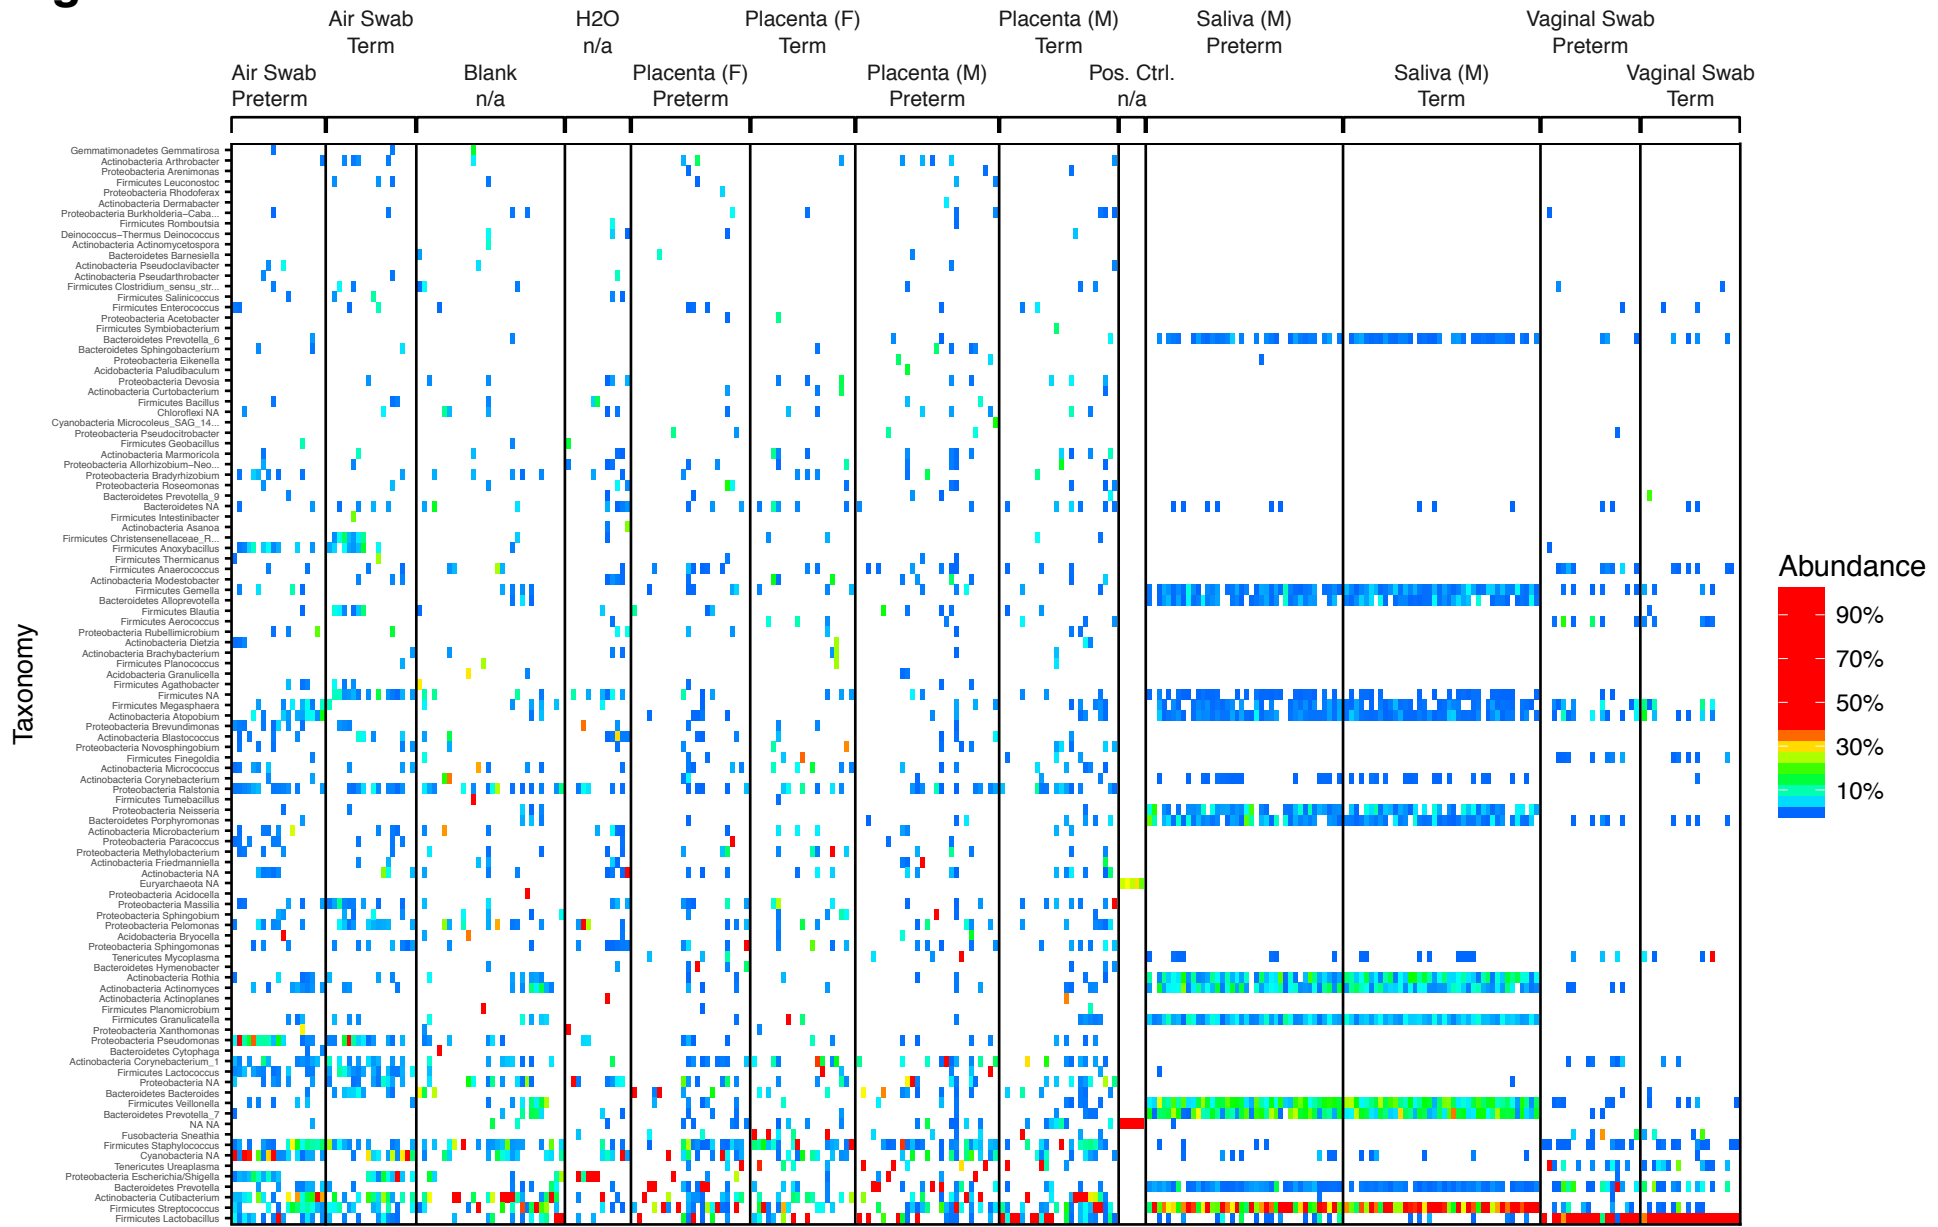

# Figure S3

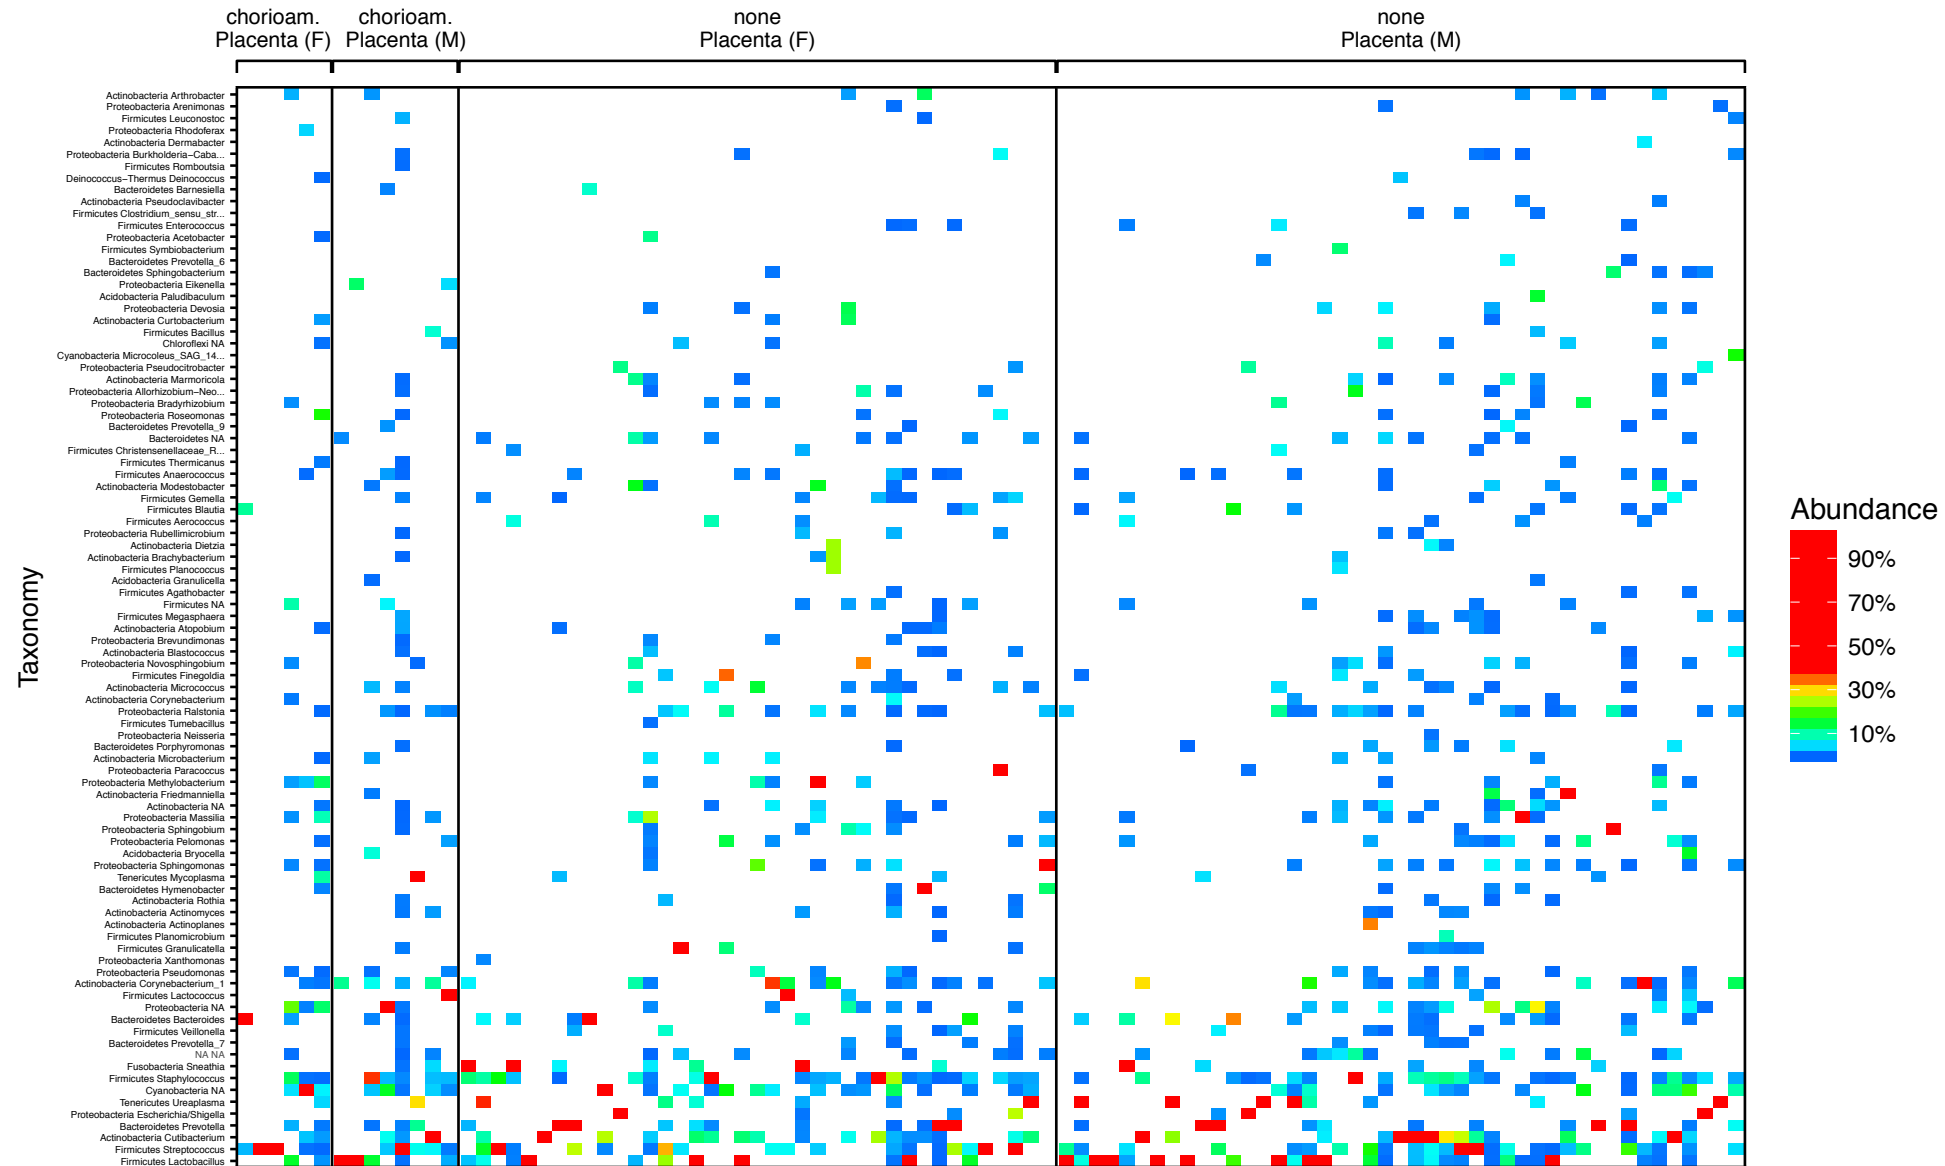

**Figure S4**

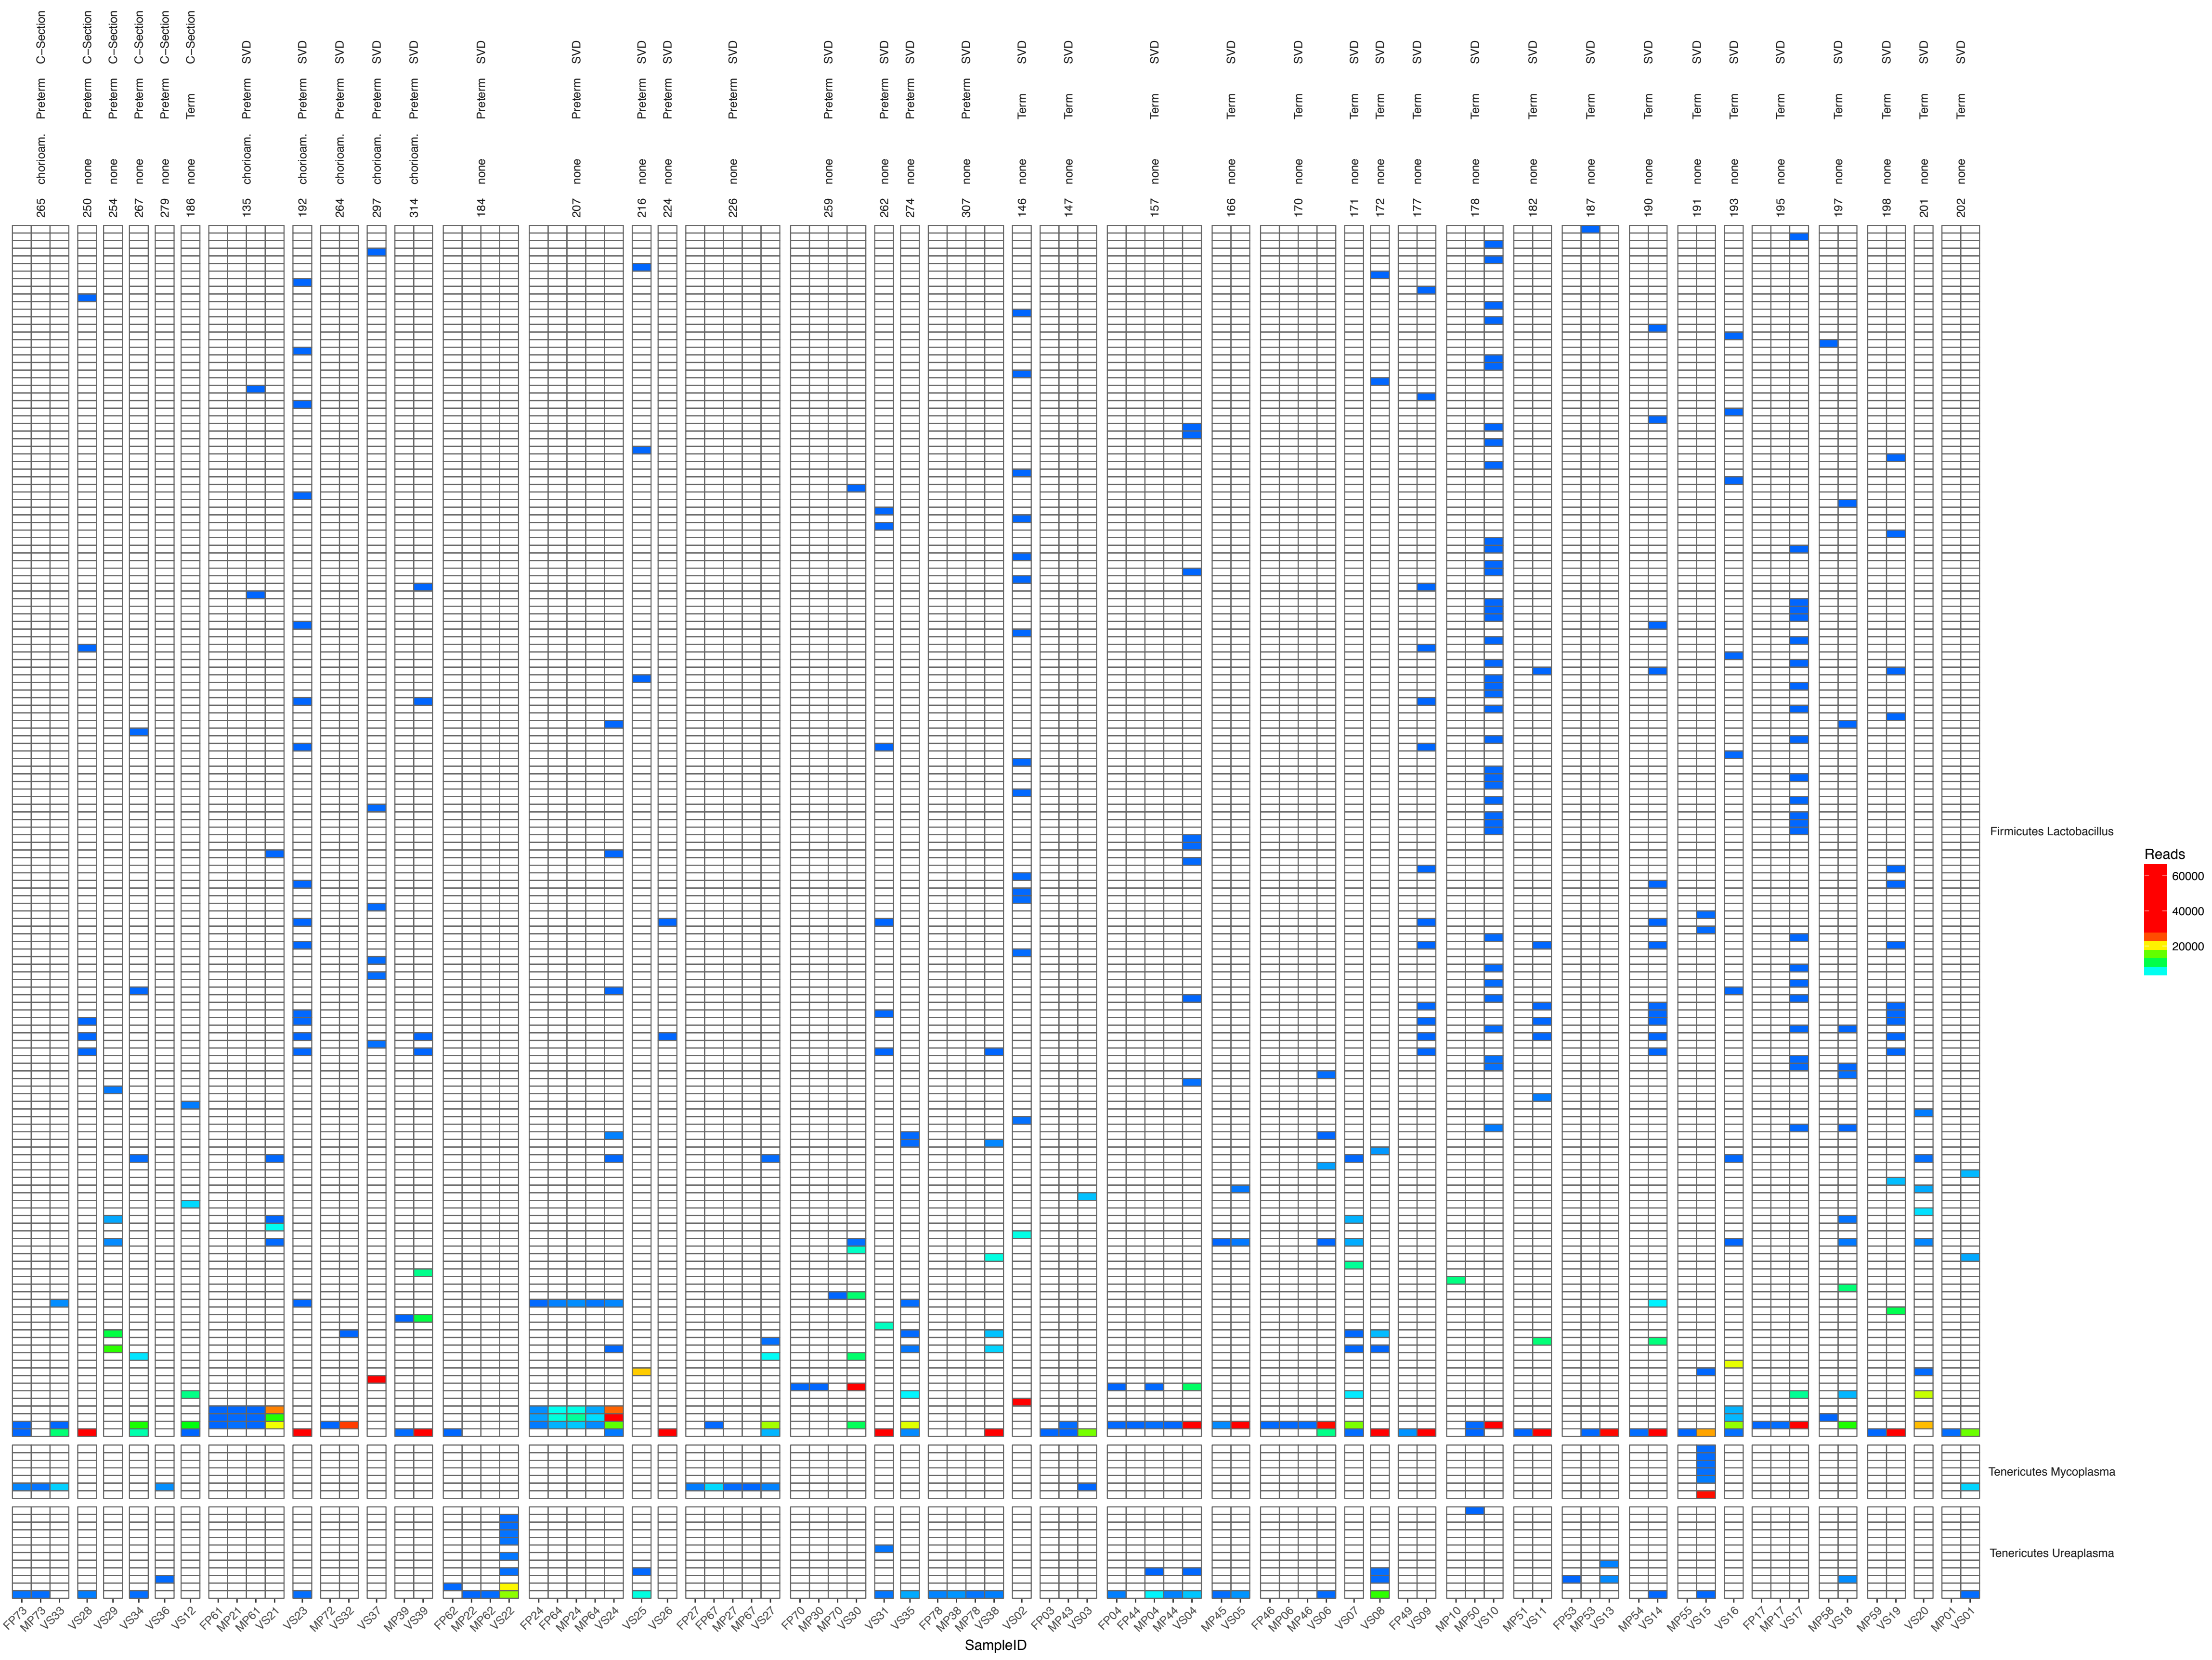

**Figure S5**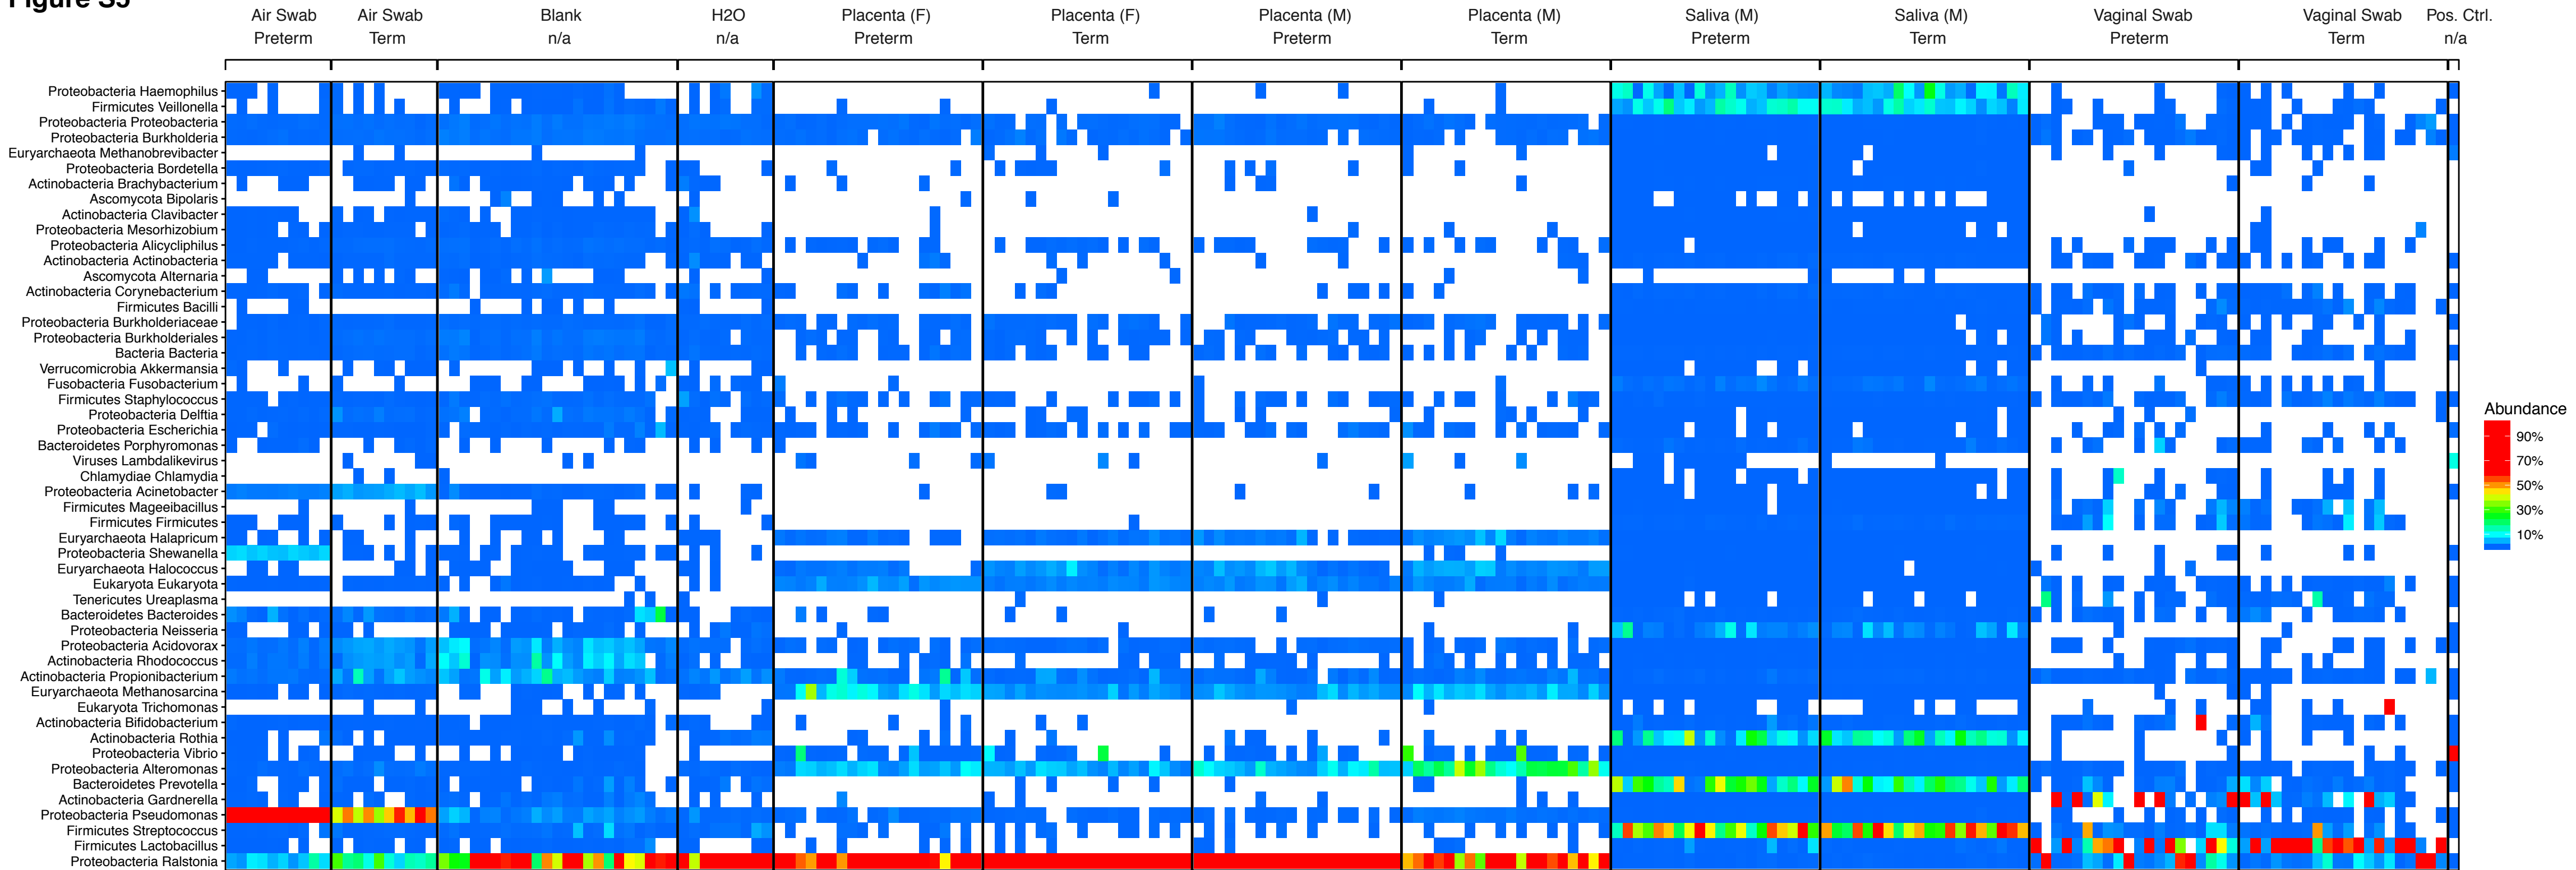

**Figure S6**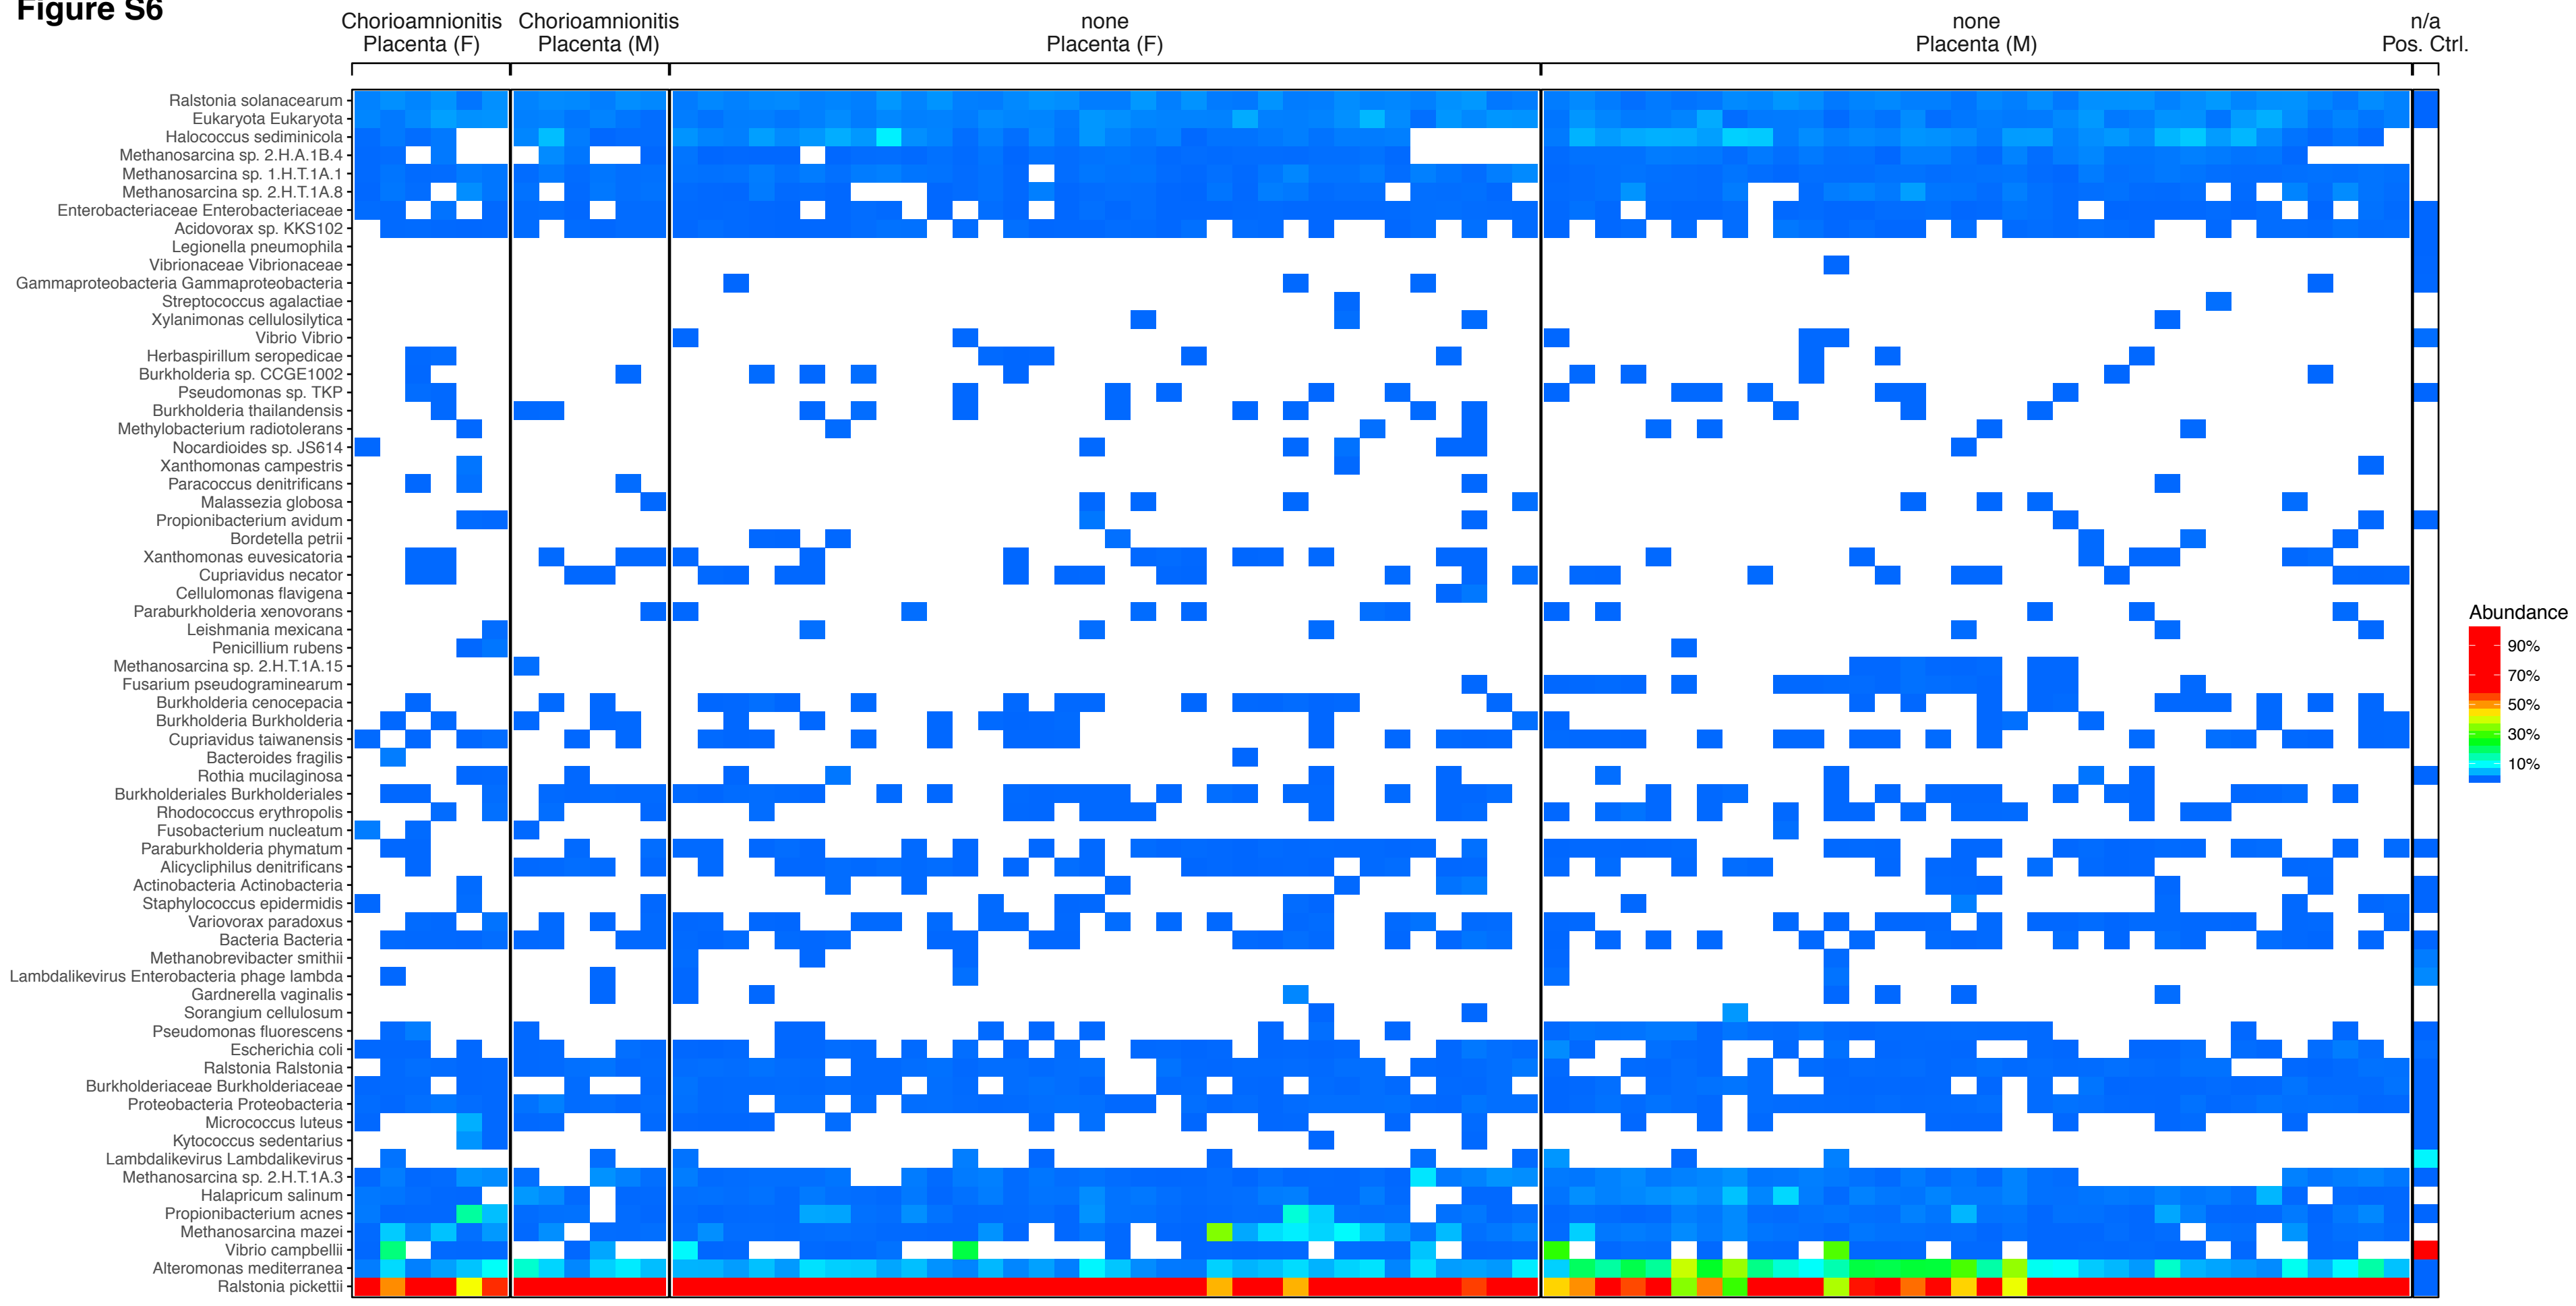

Supplement: 40168_2018_575_MOESM2_ESM.pdf [file 40168_2018_575_MOESM2_ESM.pdf]
